# Supplementary material for: Synthesis of a novel heptamethine–cyanine dye for use in near-infrared active dye-sensitized solar cells with porous zinc oxide prepared at low temperature
Source: Royal Society of Chemistry journal article supplement (doi:10.1039/c1ee01141c), 2011-01-01

### 3,3-dibutyl-2-methylindolenine (2b)

#### $^1\text{H NMR}$

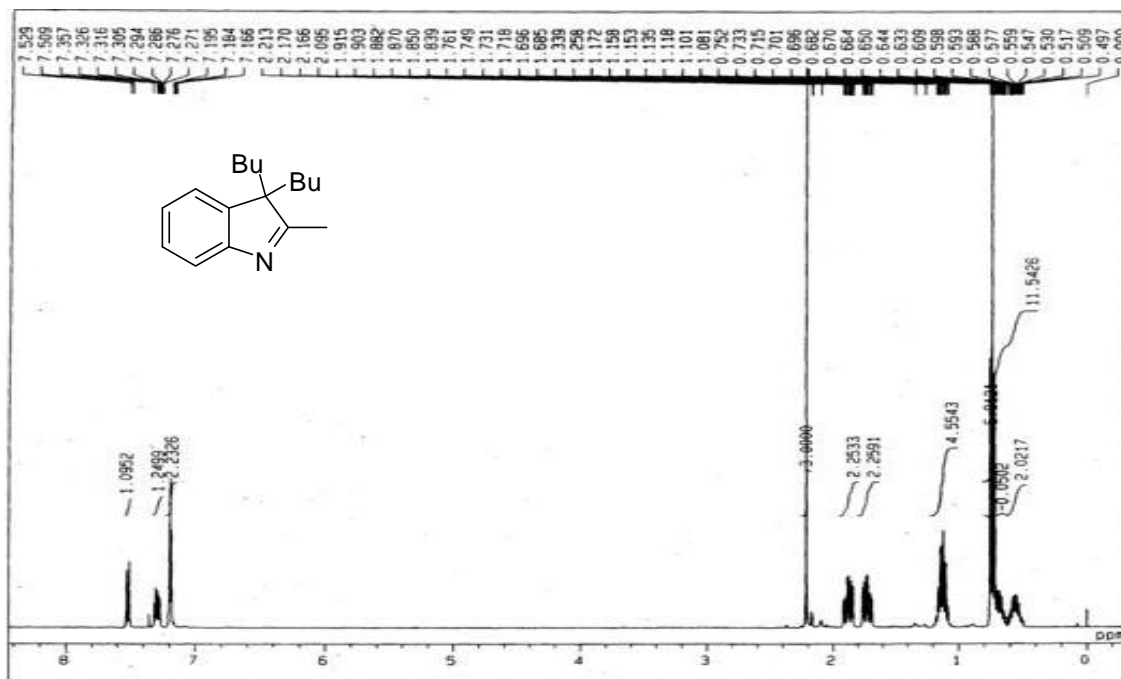

#### $^{13}\text{C NMR}$

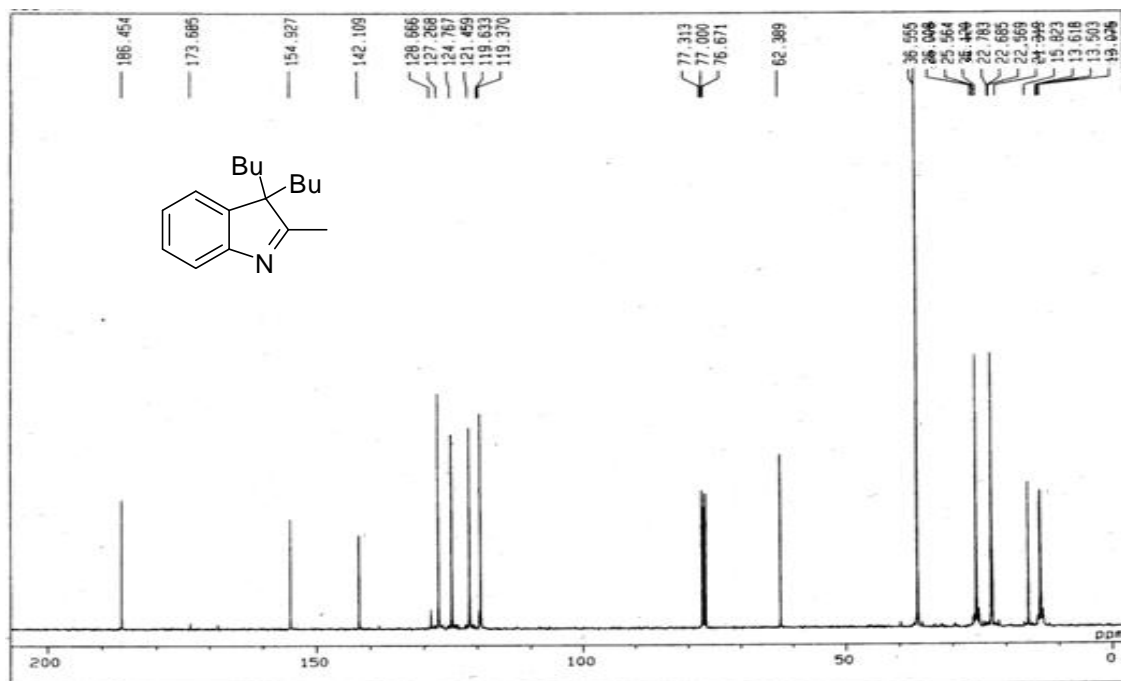

### 1-carboxyethyl-3,3-dibutyl-2-methylindolenium iodide (3b)

#### <sup>1</sup>H NMR

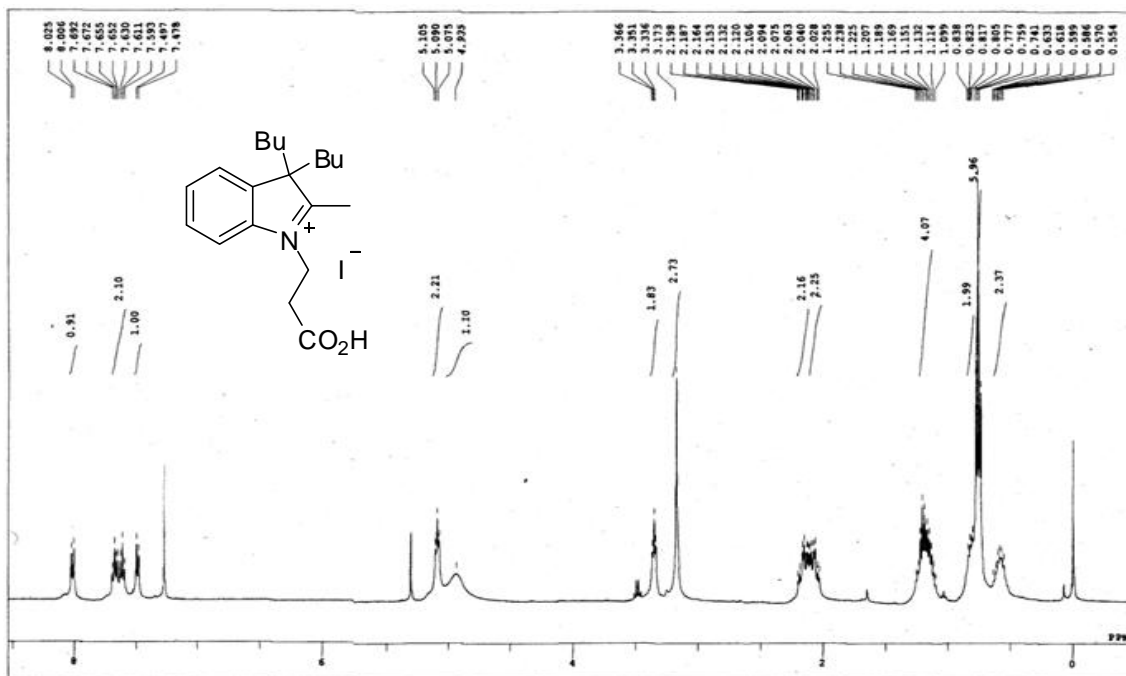

#### <sup>13</sup>C NMR

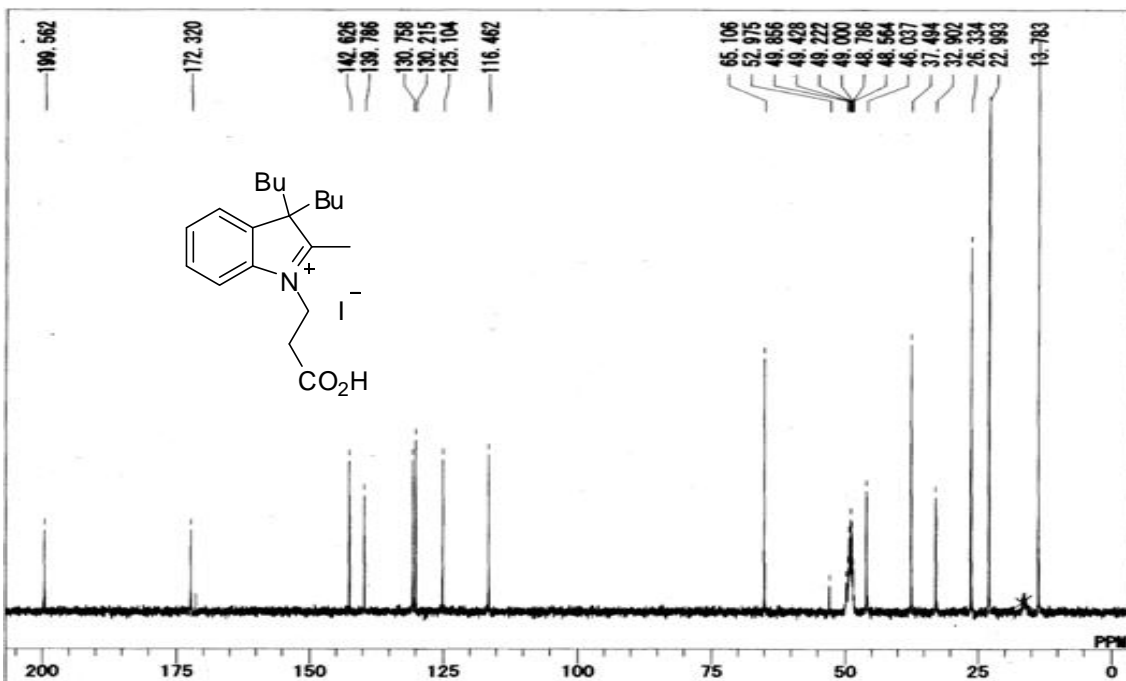

## 2-chloro-4-ethyl-1-formyl-3-hydroxymethylenecyclohexene (4)

### $^1\text{H NMR}$

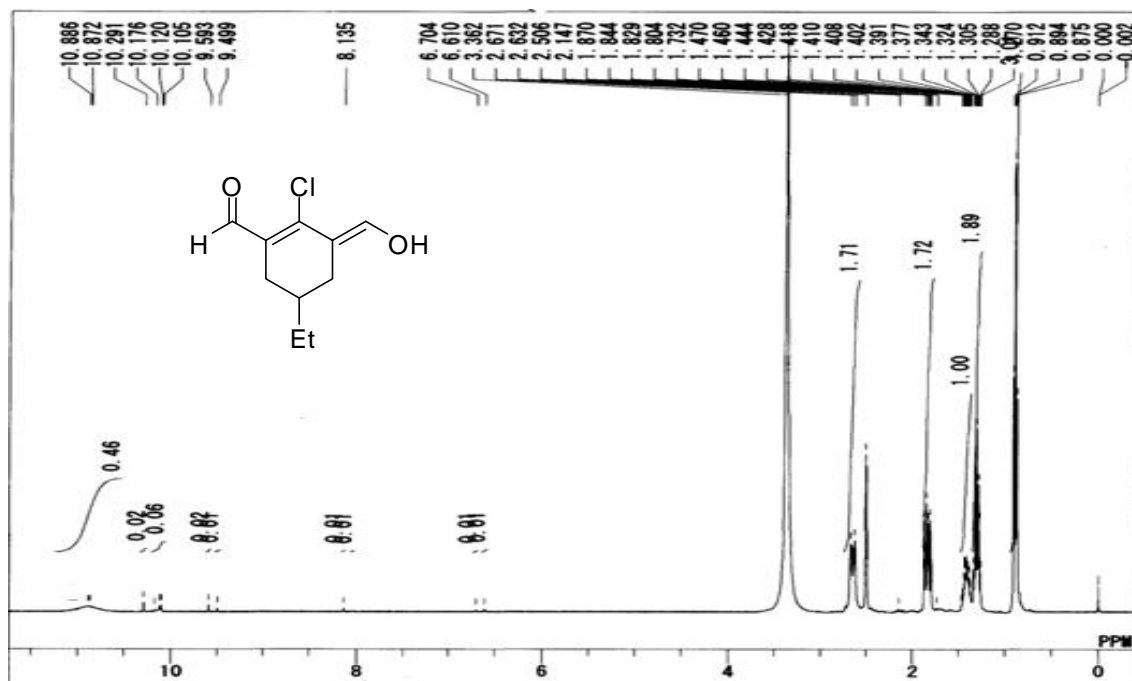

### $^{13}\text{C NMR}$

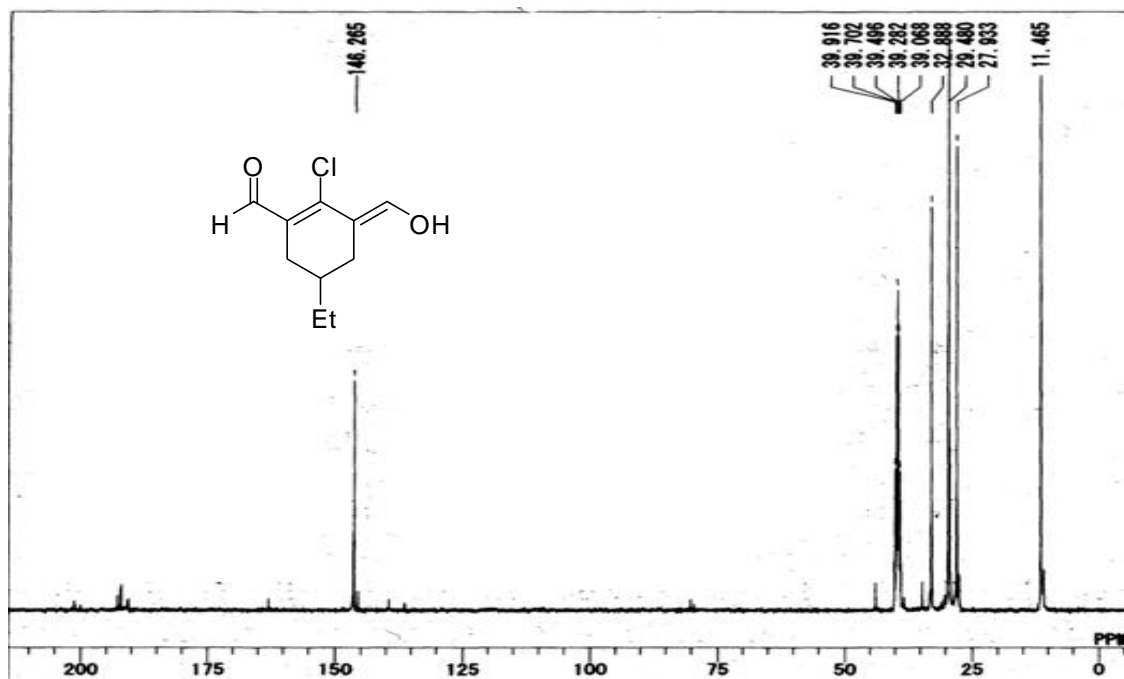

**3,3-dibutyl-1-(2-carboxyethyl)-2-((E)-2-((E)-2-chloro-3-((E)-2-(3,3-dibutyl-1-(2-carboxyethyl)indol-2-ylidene)ethylidene)-5-ethylcyclohex-1-enyl)vinyl)-3H-indolium iodide (KFH-3)**

**<sup>1</sup>H NMR**

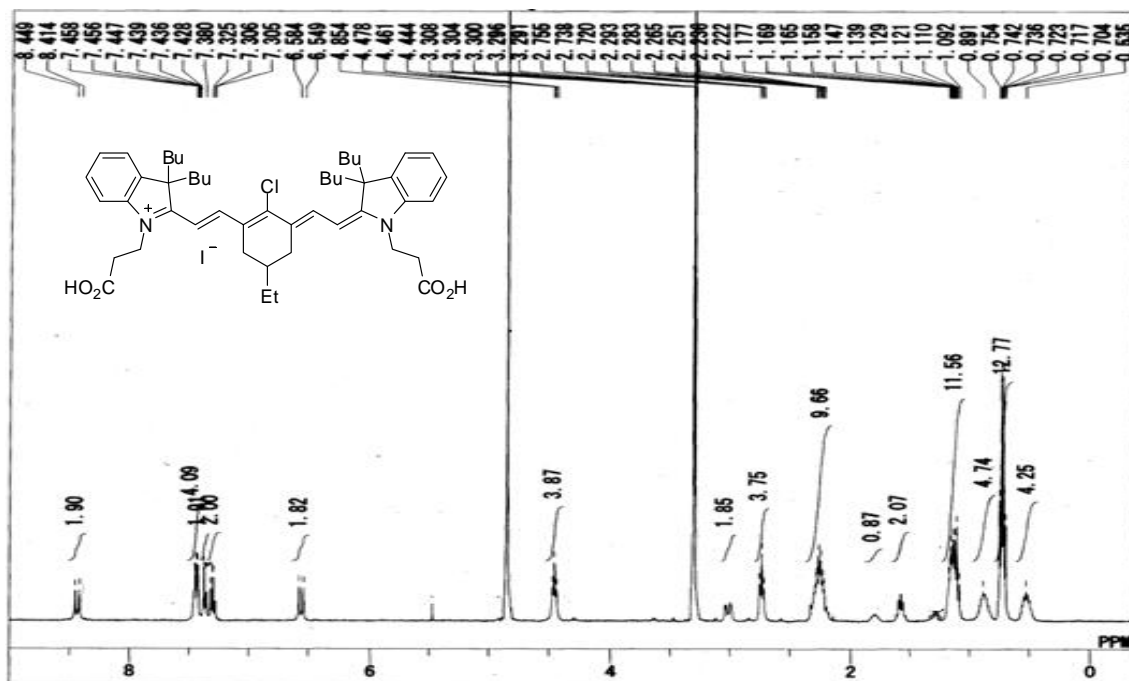

**<sup>13</sup>C NMR**

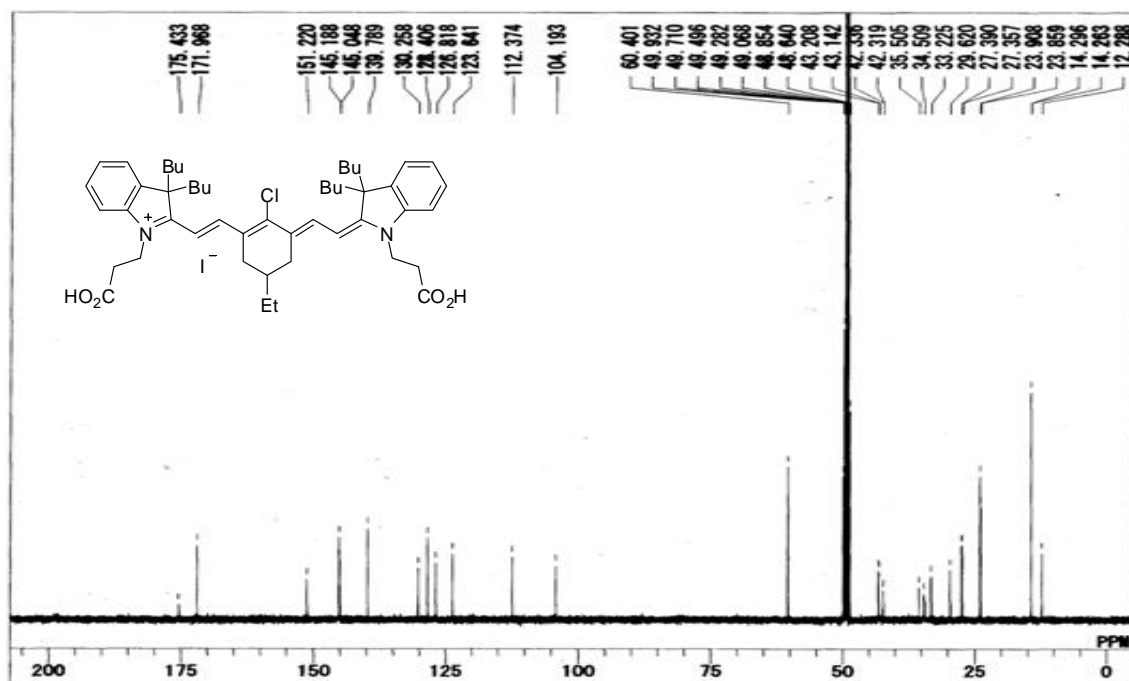

**1-(2-Carboxyethyl)-2-((E)-2-((E)-3-((E)-2-(1-(2-carboxyethyl)-3,3-dimethylindolin-2-ylidene)et  
hydylidene)-2-chloro-5-ethylcyclohex-1-enyl)vinyl)-3,3-dimethyl-3H-indolium iodide (KFH-2)**

**<sup>1</sup>H NMR**

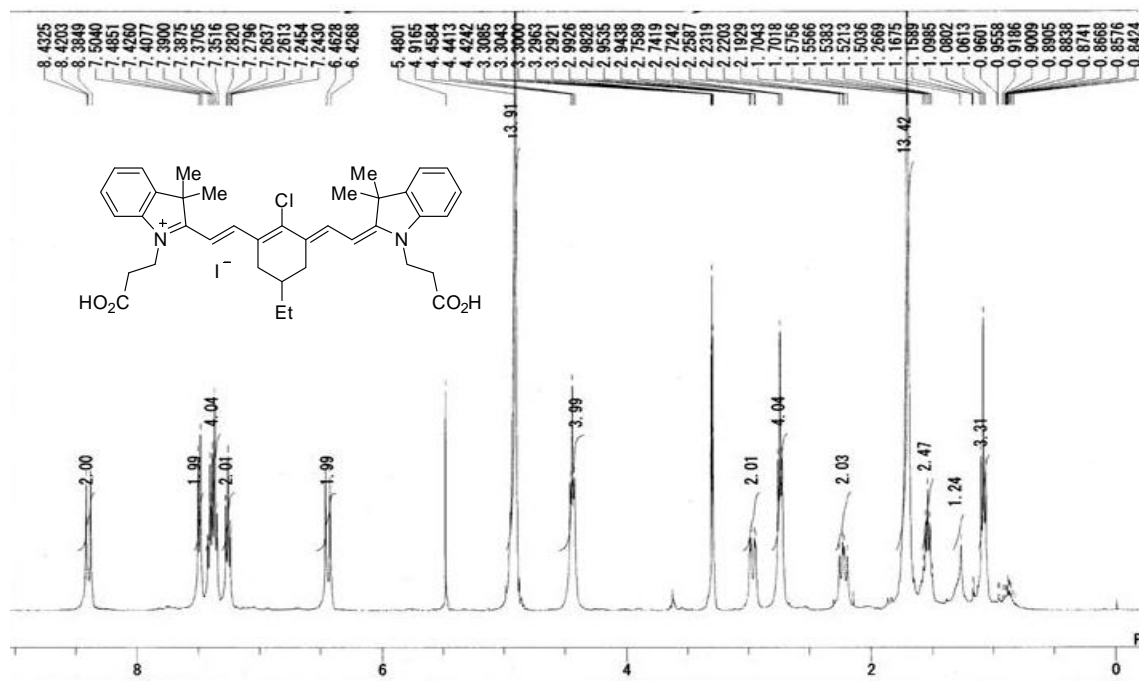

**<sup>13</sup>C NMR**

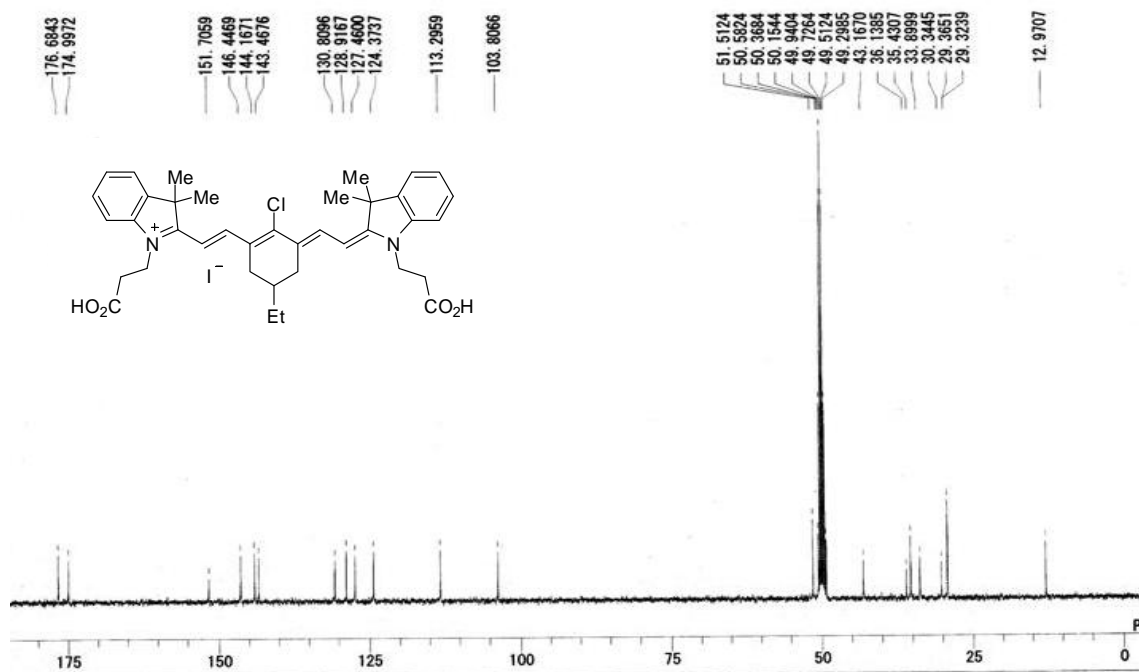

Supplement: c1ee01141c.pdf [file c1ee01141c.pdf]
